# Supplementary material
Source: MDPI journal article supplement (https://www.mdpi.com/2073-4395/13/2/322)
Supplement: s1 [file s1]

# **Supplementary Tables**

**S1.** Distribution of very early (MG000) and early (MG00) soybean cultivars grown over the five years of trials (2017-2021). Number of entries per trial and number of trials per year are summarized at the bottom.

| Cultivars MG00 | 2017 | 2018 | 2019 | 2020 | 2021 | Cultivars MG000 | 2017 | 2018 | 2019 | 2020 | 2021 |
|----------------|------|------|------|------|------|-----------------|------|------|------|------|------|
| ABIOLA         |      |      |      | X    | X    | ALICIA          |      |      |      | X    | X    |
| ACARDIA        |      |      |      | X    | X    | AURELINA        |      |      | X    | X    | X    |
| ACHILLEA       |      |      |      |      | X    | CANTATE PZO     |      |      |      | X    | X    |
| ADELFA         |      |      |      | X    | X    | ES COLLECTOR    |      |      |      |      | X    |
| ALBENGA        |      |      | X    | X    |      | ES COMANDOR     | X    | X    | X    | X    | X    |
| ALTONA         |      |      |      | X    | X    | ES COMPOSITOR   |      |      |      | X    | X    |
| AMIATA         |      |      | X    | X    | X    | ES FAVOR        |      |      | X    | X    |      |
| ANGELICA       | X    | X    | X    | X    |      | ES GOVERNOR     |      |      | X    | X    | X    |
| ASUKA          | X    |      |      |      |      | ES NAVIGATOR    | X    |      |      |      |      |
| ATACAMA        |      |      | X    | X    | X    | GALICE          |      | X    | X    |      |      |
| BETTINA        | X    | X    |      |      |      | HERTA PZO       | X    |      |      |      |      |
| CORALINE       | X    | X    |      |      |      | NESSIE PZO      |      |      |      |      | X    |
| DAKOTA         |      |      |      | X    | X    | OAC ERIN        | X    |      |      |      |      |
| ES ADVISOR     | X    |      |      |      |      | OBELIX          | X    | X    | X    | X    | X    |
| ES DIRECTOR    |      |      | X    | X    |      | REGINA          | X    | X    | X    |      |      |
| ES LIBERATOR   |      |      |      | X    | X    | RGT SALSA       |      |      |      | X    | X    |
| ES MENTOR      |      | X    | X    | X    | X    | RGT SATELIA     |      |      |      | X    | X    |
| ES PROFESSOR   |      |      | X    | X    | X    | RGT SHOUNA      | X    | X    | X    | X    |      |
| MARQUISE       | X    |      |      |      |      | RGT SIGMA       |      |      |      | X    | X    |
| MERIDIAN PZO   |      | X    |      |      |      | RGT SPHINXA     |      |      | X    | X    |      |
| POCAHONTAS     |      |      |      |      | X    | SAHARA          |      |      |      |      | X    |
| RGT SAKUSA     |      |      | X    | X    | X    | SG ANSER        | X    |      |      |      |      |
| RGT SIROCA     | X    | X    | X    | X    | X    | SIRELIA         | X    | X    | X    | X    | X    |
| RGT STUMPA     | X    | X    | X    | X    | X    | SOLENA          | X    | X    | X    | X    |      |
| RGT SVELA      | X    | X    |      |      |      | STEPSA          |      |      |      |      | X    |
| SOLENA         | X    | X    | X    |      |      | SULTANA         | X    | X    | X    | X    |      |
| SOPRANA        | X    | X    | X    | X    |      | TOURMALINE      | X    | X    |      |      |      |
| TIMOR PZO      |      |      |      | X    | X    | VIOLA           | X    | X    |      |      |      |
| YAKARI         |      |      | X    | X    |      | Entries         | 13   | 10   | 12   | 16   | 15   |
| Entries        | 11   | 10   | 13   | 19   | 15   | Trials          | 11   | 12   | 13   | 13   | 18   |
| Trials         | 9    | 8    | 7    | 9    | 12   |                 |      |      |      |      |      |

**S2.** Maturity groups 00 and 000 (MG00 and MG000, respectively) genetic coefficients used for the simulation of MG00 and MG000 environments, respectively. The genetic coefficients correspond to the Critical Short-Day Length (CSDL) below which reproductive development progresses with no daylength effect (hour), the slope of the relative response of development to photoperiod with time (hour-1) (PPSEN), the time between plant emergence and flower appearance (photothermal days) (EM-FL), the time between first flower and first pod (photothermal days) (FL-SH), the time between first flower and first seed (photothermal days) (FL-SD), time between first seed and physiological maturity (photothermal days) (SD-PM) and the time between first flower and end of leaf expansion (photothermal days) (FL-LF).

| Maturity Groups | Genetic coefficients |       |       |       |       |       |       |
|-----------------|----------------------|-------|-------|-------|-------|-------|-------|
|                 | CSDL                 | PPSEN | EM-FL | FL-SH | FL-SD | SD-PM | FL-LF |
| MG 000          | 14.60                | 0.129 | 15.5  | 5     | 12    | 29.5  | 26    |
| MG 00           | 14.35                | 0.148 | 16.0  | 5     | 12    | 30.0  | 26    |
